# Supplementary material for: Integration of molecular functions at the ecosystemic level: breakthroughs and future goals of environmental genomics and post-genomics
Source: PubMed Central journal article supplement (PMC2901524; doi:10.1111/j.1461-0248.2010.01464.x), 2010-06

## Box 1 : Strategies in environmental genomics

Environmental genomics allows targeting of communities as a whole in environmental samples (community genomics, metagenomics) or of single (micro)organisms isolated from the environment (single cell genomics, organism genomics).

**(1) Isolation** : Cells belonging to a certain lineage can be separated from their community using a variety of techniques, coupled or not with Fluorescent *In Situ* Hybridization (FISH), such as flow cytometry (Zehr *et al.* 2008) or *microfluidics* (Marcy *et al.* 2007).

**(2) DNA extraction** : Genome analysis begins with the extraction of DNA from community samples, isolated cell(s) or individual(s). A Whole-Genome Amplification (WGA) should be done when required (e.g. single cells ) to get enough DNA template for sequencing. However, this step can induce important amplification bias.

**(3), (4) Library preparation and sequencing** : Depending on the aims of the studies, two different approaches can be employed. Large size fragments of DNA can be cloned into vectors such as bacterial artificial chromosomes and *fosmids*. Screening of *large-insert* libraries allow to select clones bearing functionally or phylogenetically relevant genes before sequencing (function- / organism-centered strategy) (Béjà *et al.* 2000; de la Torre *et al.* 2003). This approach is now less used mainly because of the large amount of handwork needed to prepare and to screen libraries. In the second approach, also named *shotgun sequencing*, genomic DNA is fragmented into numerous, partially overlapping, small size fragments which are then randomly sequenced (environment-centered and function- / organism-centered strategy). This approach is well adapted for second generation mass sequencers. These machines based on new sequencing technologies yield a larger quantity of sequence information at a lower price than dye-terminator sequencing. Among these, the 454 Life Sciences pyrosequencer has proved to be useful in numerous studies in the various fields of ecology (<http://www.454.com/publications-and-resources/index.asp>).

**(5) Bioinformatics analysis** : Assembly softwares are used if possible to assemble sequences into larger fragments of genomes, or even near-complete genomes. It is noteworthy that, in populations with a high genetic diversity, assembly will be made of sequences originating from different cells and will represent composite genomes (Tyson *et al.* 2004; Venter *et al.* 2004; Zehr *et al.* 2008). Ultimately, bioinformatics analyses predict genes and identify their potential functions to determine diversity and functional potentialities of naturally occurring organisms and communities.

**(6) Community and ecosystem integration** : The integration of diversity and functional profiling at the ecosystem level requires various approaches that are complementary : (meta)transcriptomics, (meta)proteomics, physiological and biochemical characterisation, experimental analysis, microscale and large-scale environmental data measurements, mathematical modelling.

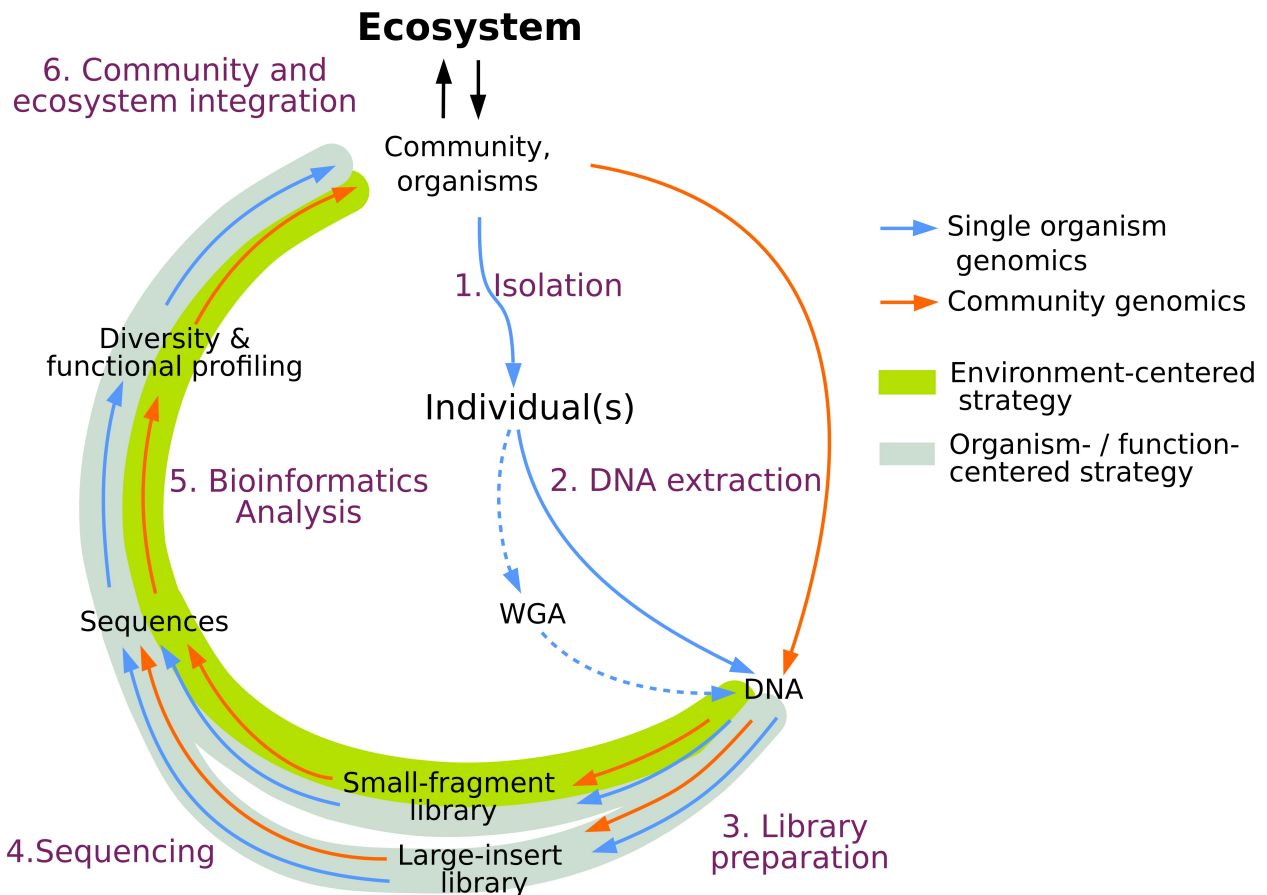

Supplement: ele0013-0776-SD1.pdf [file ele0013-0776-SD1.pdf]
